# Supplementary material for: Gene Therapy for Neuropathic Pain through siRNA-IRF5 Gene Delivery with Homing Peptides to Microglia
Source: PubMed Central journal article supplement — Mol Ther Nucleic Acids. 2018 Feb 27;11:203–15. doi: 10.1016/j.omtn.2018.02.007 (PMC5992689; doi:10.1016/j.omtn.2018.02.007), 2018-02-27
Supplement: mmc1.pdf [file mmc1.pdf]

**OMTN, Volume 11**

**Supplemental Information**

**Gene Therapy for Neuropathic Pain  
through siRNA-IRF5 Gene Delivery  
with Homing Peptides to Microglia**

**Tomoya Terashima, Nobuhiro Ogawa, Yuki Nakae, Toshiyuki Sato, Miwako Katagi, Junko Okano, Hiroshi Maegawa, and Hideto Kojima**

# Figure S1

A

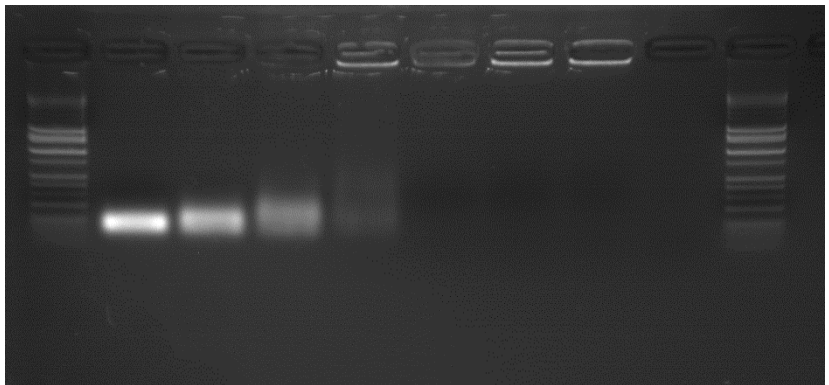

|                          |           |     |     |     |         |     |     |     |
|--------------------------|-----------|-----|-----|-----|---------|-----|-----|-----|
| siRNA-IRF5( $\mu$ g)     | ————— 0.4 |     |     |     | ————— 0 |     |     |     |
| MG1-9R peptide( $\mu$ g) | 0         | 0.2 | 0.4 | 0.8 | 1.2     | 1.6 | 2.0 | 2.0 |

B

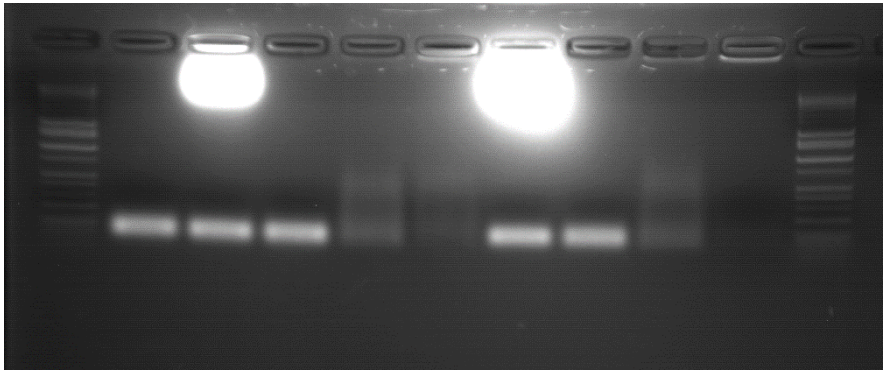

|                       |           |      |     |     |           |      |     |     |     |
|-----------------------|-----------|------|-----|-----|-----------|------|-----|-----|-----|
| siRNA-IRF5( $\mu$ g)  | ————— 0.4 |      |     |     | ————— 0.4 |      |     |     |     |
| MG1 peptide( $\mu$ g) | 0         | 0.8  | 0.8 | 0.8 | 0.8       | 1.2  | 1.2 | 1.2 | 1.2 |
| Arginine residues     |           | 0R   | 3R  | 6R  | 9R        | 0R   | 3R  | 6R  | 9R  |
|                       |           |      |     |     |           |      |     |     |     |
|                       |           | FITC |     |     |           | FITC |     |     |     |

**Figure S1**

**Electrophoresis of the complexes between MG1 peptide and siRNA-IRF5.**

(A) and (B) 1.5% Agarose gel after electrophoresis of the complexes between peptides and siRNA. (A) MG1-9R peptide and siRNA-IRF5 were mixed and were applied at the combination of the concentration shown at the lower side of each lane. (B) MG1 peptide with polyarginine and siRNA-IRF5 were mixed and were applied at the combination of the concentration shown at the lower side of each lane. 0R, 3R, 6R and 9R mean the number of arginine (R) bound with MG1 peptide. Only MG1-0R were conjugated with FITC. FITC, fluorescein isothiocyanate. MG, microglia specific peptides.
